# Supplementary material
Source: PubMed Central journal article supplement (PMC7408203)
Supplement: ao0c02028_si_001.pdf [file ao0c02028_si_001.pdf]

# Graphene Oxide - Copolyvinylpyrrolidone Hybrid Microspheres for the Efficient Adsorption of 2,4,6-Trichlorophenol

*Xiaofei Lv, Sifang Li\**

Department of Chemical and Biochemical Engineering, College of Chemistry and Chemical Engineering, Xiamen University, Xiamen 361005, China

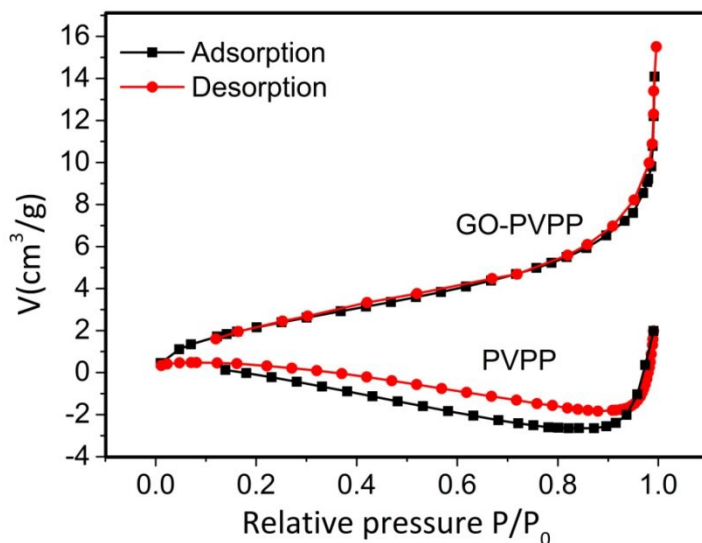

**Figure S1.** N<sub>2</sub> adsorption and desorption curves of GO-PVPP and PVPP.

\* Corresponding Author. E-mail: sfli@xmu.edu.cn

**Table S1.** Physiochemical Properties of the PVPP and GO-PVPP

| Materials | Swelling rate (%) | Specific surface area (m <sup>2</sup> /g) | Pore diameter (nm) | pore volume (cm <sup>3</sup> /g) |
|-----------|-------------------|-------------------------------------------|--------------------|----------------------------------|
| GO-PVPP   | 272.81            | 10.46                                     | 28.58              | 0.0092                           |
| PPVP      | 60.40             | 1.14                                      | 36.71              | 0.00265                          |

**Table S2.** Elemental Analysis of the PVPP and GO-PVPP

| Materials | Elemental analysis (%) |      |       |
|-----------|------------------------|------|-------|
|           | C                      | H    | N     |
| GO-PVPP   | 45.00                  | 6.89 | 9.66  |
| PPVP      | 50.92                  | 8.02 | 14.62 |

**Table S3.** Parameters for Intraparticle Diffusion Model

| C <sub>0</sub> (mg/L) | Intraparticle diffusion model                           |            |            |                |                |                |                             |                             |                             |
|-----------------------|---------------------------------------------------------|------------|------------|----------------|----------------|----------------|-----------------------------|-----------------------------|-----------------------------|
|                       | $k_{ip,1}$<br>(mg g <sup>-1</sup> min <sup>-1/2</sup> ) | $k_{ip,2}$ | $k_{ip,3}$ | C <sub>1</sub> | C <sub>2</sub> | C <sub>3</sub> | R <sub>1</sub> <sup>2</sup> | R <sub>2</sub> <sup>2</sup> | R <sub>3</sub> <sup>2</sup> |
| 50                    | 7.29                                                    | 0.31       | -          | 1.8            | 58.6           | -              | 0.9877                      | 0.9618                      | -                           |
| 100                   | 15.37                                                   | 0.57       | -          | 6.0            | 117.3          | -              | 0.9793                      | 0.9296                      | -                           |
| 200                   | 32.39                                                   | 6.69       | 0.41       | 1.9            | 125.7          | 200.5          | 0.9883                      | 0.9308                      | 0.8745                      |
| 250                   | 34.76                                                   | 1.41       | 0.30       | 5.2            | 214.2          | 236.6          | 0.9902                      | 0.9857                      | 0.9612                      |
| 300                   | 51.72                                                   | 2.34       | 0.28       | -0.6           | 226.8          | 257.8          | 0.9446                      | 0.9770                      | 0.8739                      |

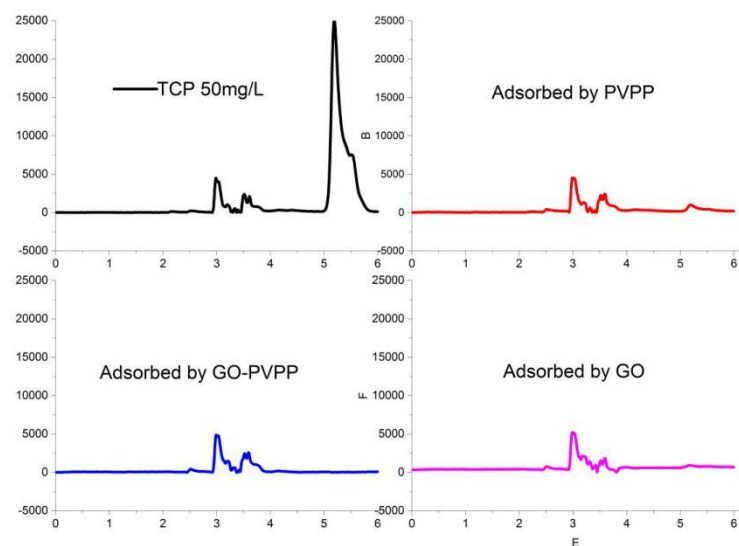

**Figure S2.** HPLC chromatograms of 2,4,6-TCP before and after adsorption by different adsorbents ( $C_0=50$  mg/L, adsorbent dosage = 1 g/L,  $T = 30$  °C, pH = 4,  $t = 6$  h).

**Table S4.** Detection Parameters of HPLC Method for 2,4,6-TCP

|                        |                                                      |
|------------------------|------------------------------------------------------|
| HPLC instrument model  | Agilent 1100                                         |
| Mobile phase           | Methanol : pure water = 80 :20                       |
| Detection wavelength   | 290 nm                                               |
| Flow rate              | 1 mL/min                                             |
| Chromatographic column | Eclipse Plus C18<br>3.5 $\mu$ m, 4.6 $\times$ 150 mm |
| Column temperature     | 30 °C                                                |
| Detection limit        | 18.565 $\mu$ g/L                                     |

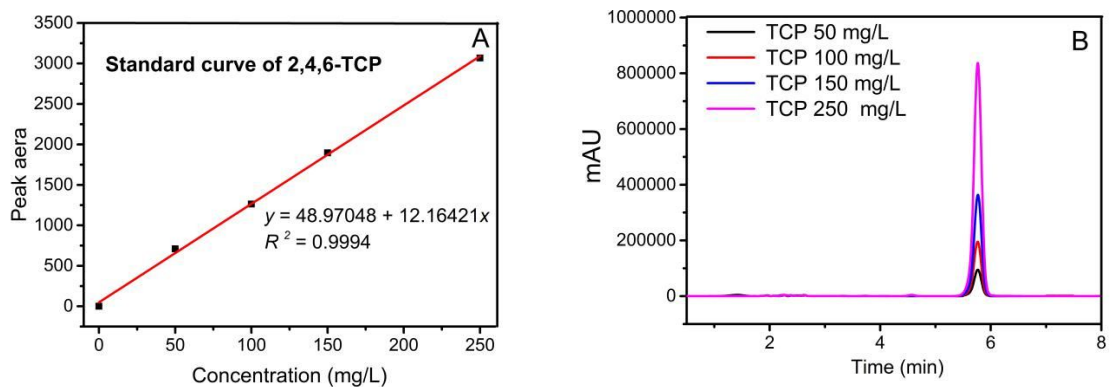

**Figure S3.** (A) HPLC standard curve of TCP solution. (B) Chromatographic peaks of TCP standard solutions at 290 nm.
